# Supplementary material for: Photodegradation and Biodegradation of Poly(Lactic) Acid Containing Orotic Acid as a Nucleation Agent
Source: MDPI journal article supplement (doi:10.3390/ma12030481), 2019-02-04
Supplement: s1 [file s1]

# Photodegradation and Biodegradation of Poly(Lactic) Acid Containing Orotic Acid as a Nucleation Agent

Jan Salač<sup>1</sup>, Jana Šerá<sup>1</sup>, Martin Jurča<sup>1</sup>, Vincent Verney<sup>2</sup>, Adam Marek<sup>3</sup> and Marek Koutný<sup>1,\*</sup>

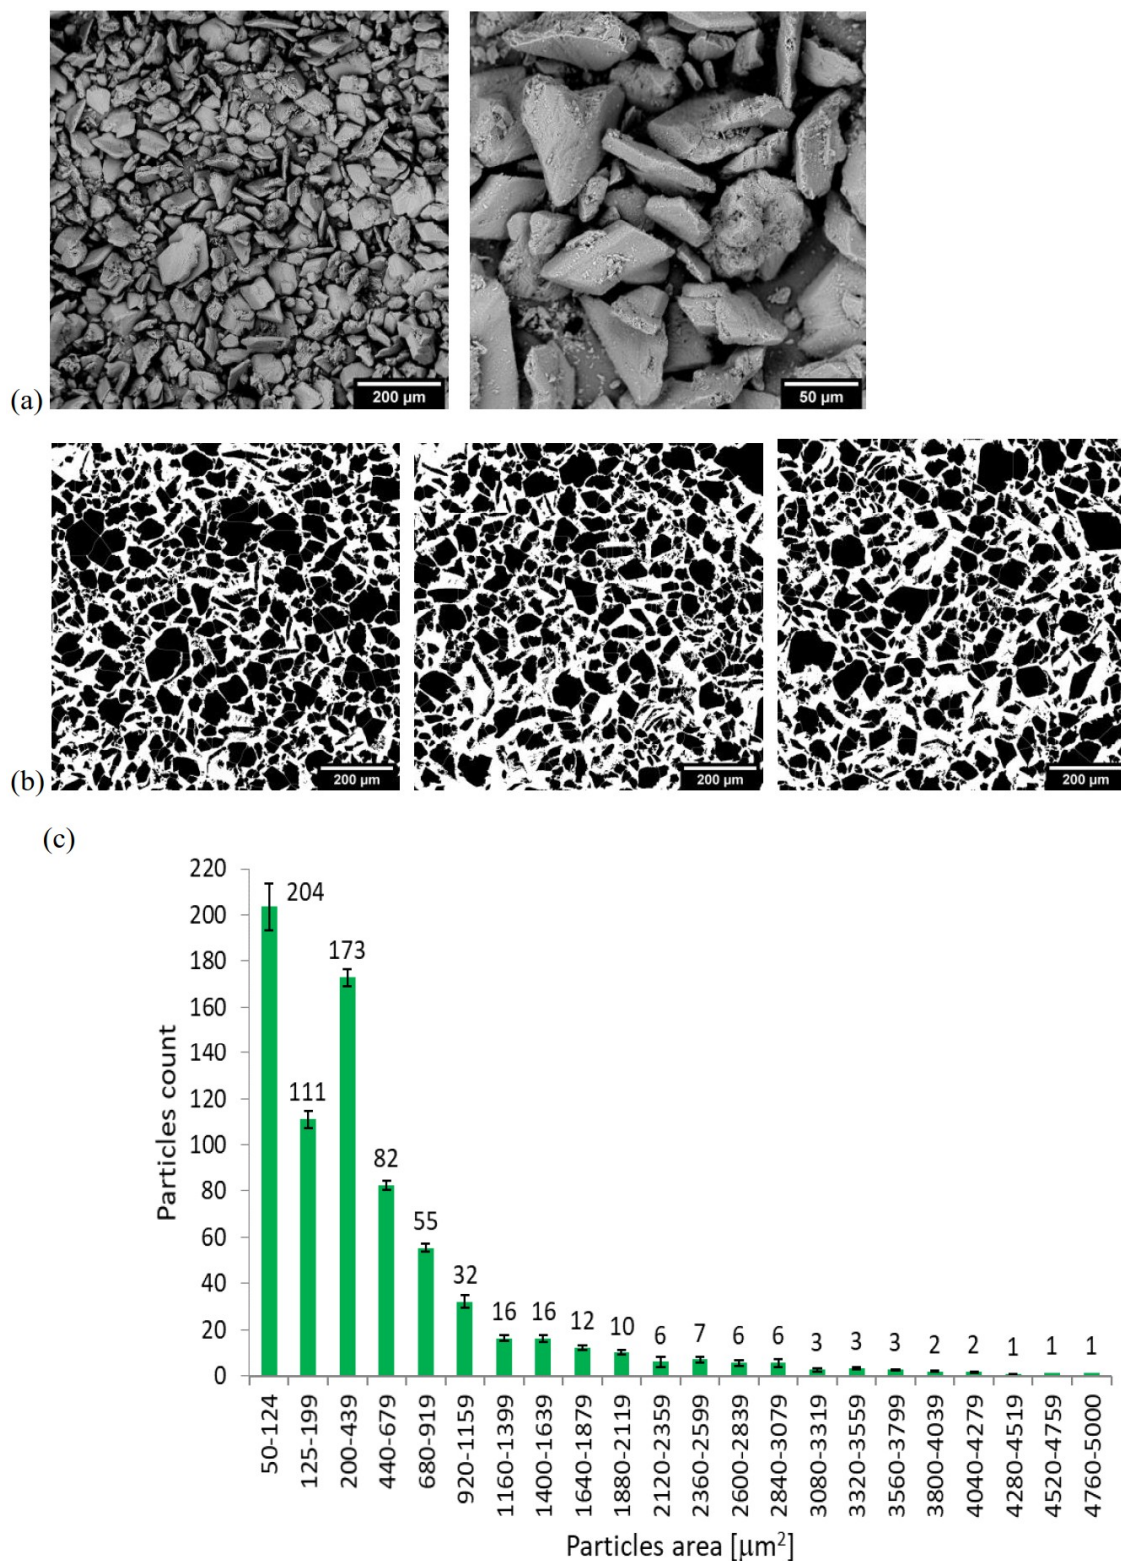

**Figure S1.** (a) SEM micrographs of OA powder. (b) Threshold sharpened images of OA grains used for the image analysis. (c) Distribution of cross-section areas of OA grains.

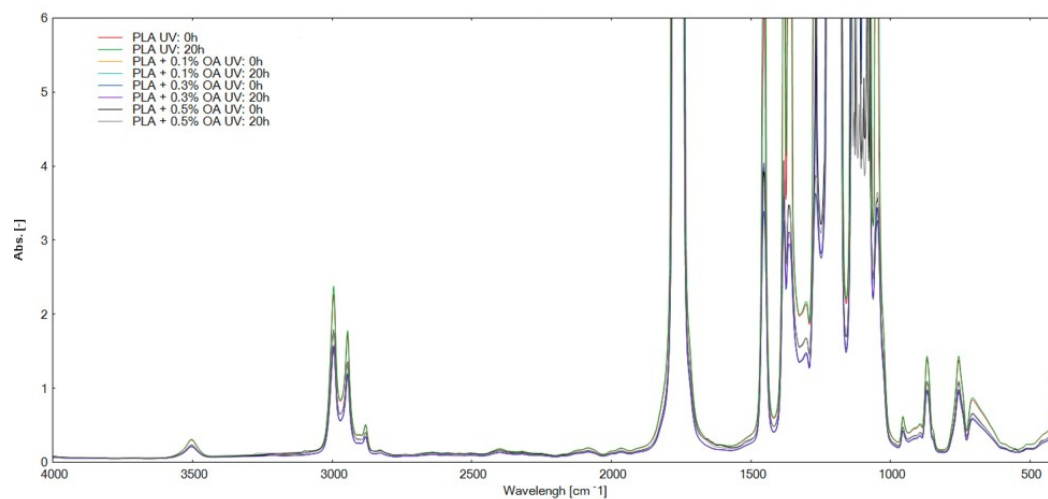

**Figure S2.** FTIR spectra of the investigated PLA materials with different contents of OA, both the initial and after 20 h of the photodegradation.

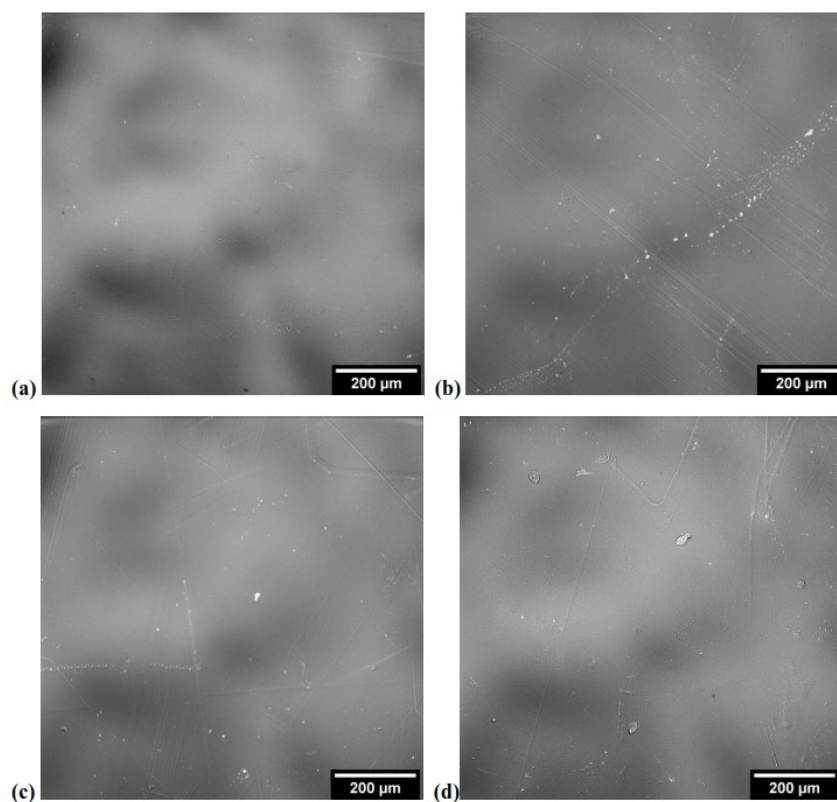

**Figure S3.** SEM of PLA materials before and after photodegradation. PLA (a), PLA after 75 hours of photodegradation (b), PLA with 0.3% of OA (c), PLA with 0.3% of OA after 75 h of photodegradation (d).
